# Supplementary material for: Acetate supplementation restores cognitive deficits caused by ARID1A haploinsufficiency in excitatory neurons
Source: PubMed Central journal article supplement (PMC9728054; doi:10.15252/emmm.202215795), 2022-11-17
Supplement: EMMM-14-e15795-s001.pdf [file EMMM-14-e15795-s001.pdf]

## Expanded View Figures

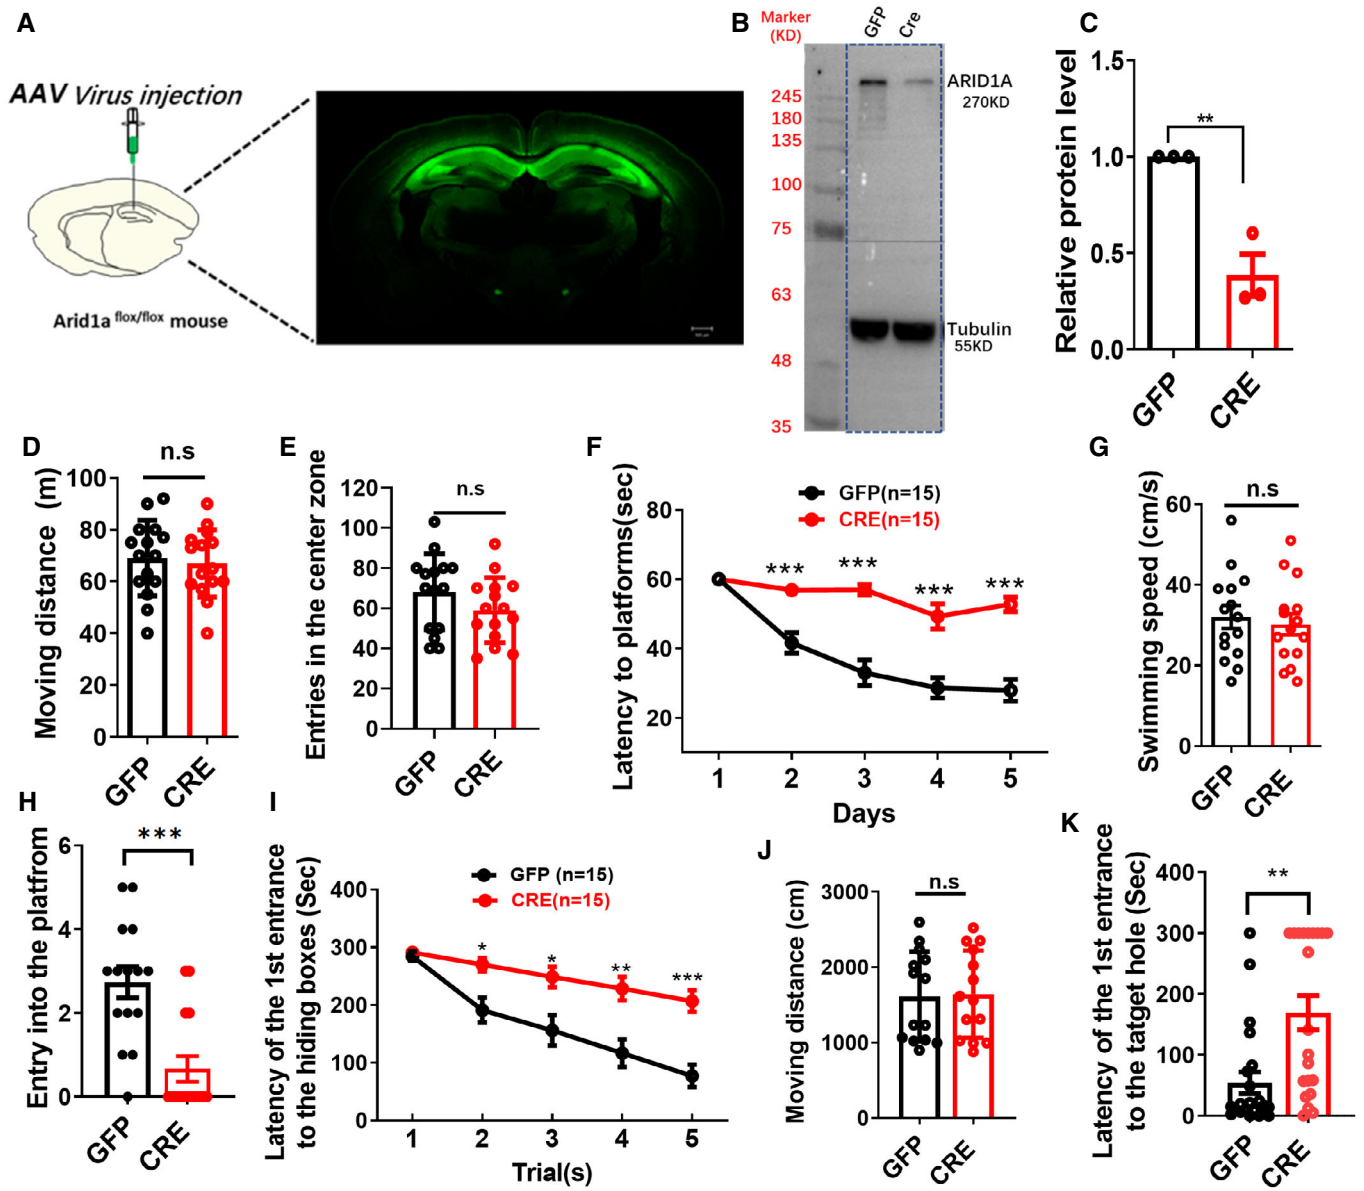

Figure EV1.

**Figure EV1. Reduced expression of *Arid1a* exhibits impaired learning and memory disability.**

- A Schematic illustrating injection of AAV-CRE-GFP or AAV-GFP control virus in adult *Arid1a*<sup>fl/fl</sup> hippocampus (left), representative images showing GFP expression in the hippocampus after 1-month viral injection (right). Scale bar, 500  $\mu$ m.
- B Representative Western blot images for ARID1A expression. ARID1A expression is downregulated in the hippocampus after AAV-Cre injection. Tubulin was used as a loading control.
- C Quantification of ARID1A protein levels in hippocampal tissues from GFP and AAV-Cre mice ( $n = 3$  mice).
- D AAV-Cre mice had comparable locomotion to GFP littermate mice in open field test over a 30-min period (AAV-GFP,  $n = 15$  mice; AAV-Cre,  $n = 15$  mice).
- E AAV-Cre mice had comparable entries into the center zone during a 30-min open field test compared to GFP littermate mice (AAV-GFP,  $n = 15$  mice; AAV-Cre,  $n = 15$  mice; n.s., nonsignificant).
- F AAV-Cre mice spent more time reaching the platform during the 5-day training in the Morris water maze test (AAV-GFP,  $n = 15$  mice; AAV-Cre,  $n = 15$  mice).
- G AAV-Cre mice showed similar swimming speed in the Morris water maze test compared to GFP mice (AAV-GFP,  $n = 15$  mice; AAV-Cre,  $n = 15$  mice).
- H AAV-Cre mice crossed the platform less frequently in the Morris water maze test (AAV-GFP,  $n = 15$  mice; AAV-Cre,  $n = 15$  mice).
- I AAV-Cre mice spent more time finding the escape box during 5-day training in the Barnes maze test (AAV-GFP,  $n = 15$  mice; AAV-Cre,  $n = 15$  mice).
- J AAV-Cre mice showed similar moving distances in the Morris water maze test compared to GFP mice (AAV-GFP,  $n = 15$  mice; AAV-Cre,  $n = 15$  mice).
- K AAV-Cre mice showed longer latency when finding the escape box in the Barnes maze test (AAV-GFP,  $n = 15$  mice; AAV-Cre,  $n = 15$  mice).

Data information: Data represent means  $\pm$  SEM. In (C–E), \*\* $P < 0.01$ , n.s. = nonsignificant (unpaired two-tailed  $t$ -test). In (F),  $P > 0.9999$  (day 1), \*\*\* $P < 0.001$  (day 2), \*\*\* $P < 0.001$  (day 3), \*\*\* $P < 0.001$  (day 4), \*\*\* $P < 0.001$  (day 5; two-way ANOVA with Bonferroni *post hoc* test). In (G, H), n.s. = nonsignificant, \*\*\* $P < 0.001$  (unpaired two-tailed  $t$ -test). In (I),  $P > 0.9999$  (Trial 1), \* $P < 0.05$  (Trial 2), \* $P < 0.05$  (Trial 3), \*\* $P < 0.01$  (Trial 4), \*\*\* $P < 0.001$  (Trial 5; two-way ANOVA with Bonferroni *post hoc* test). In (J, K), n.s. = nonsignificant, \*\* $P < 0.01$  (unpaired two-tailed  $t$ -test). Source data are available online for this figure.

**Figure EV2. Supplementation of Acetate rescues neuronal morphology deficits caused by *Arid1a* haploinsufficiency in excitatory neurons.**

- A Change in the body weight of mice after chronic treatment with ethyl acetate ( $n = 5$  mice per group).
- B Separate channels of the triple immunostainings staining of DAPI (blue), H3K27ac (green), and Vgult1 (red) in forebrain tissues of *Arid1a*<sup>fl/+</sup> and cHet mice, respectively. IF staining was performed on 40- $\mu$ m thick floating sections. Relative fluorescence intensities of H3K27ac decreased upon the loss of *Arid1a* in the cortex. Scale Bar, 20  $\mu$ m.
- C Open field test in *Arid1a*<sup>fl/+</sup> and cHet mice treated with vehicle or Acetate. *Arid1a*<sup>fl/+</sup> and cHet mice treated with vehicle or Acetate had similar locomotion in open field tests over a 30-min period ( $n = 15$  mice per group).
- D *Arid1a*<sup>fl/+</sup> and cHet mice treated with vehicle or Acetate displayed similar entry tendencies into the center zone during a 30-min open field test, ( $n = 15$  mice per group).
- E The digitized trace of Golgi-stained coronal sections in the hippocampal CA1 region of adult (2-months-old) Vehicle or Acetate-treated cHet mice. Scale Bar, 50  $\mu$ m.
- F Quantification of total dendritic length from dendritic tree reconstructions shown in (E), at least 15 neurons from  $n = 3$  mice per group.
- G Sholl analysis of dendritic branching complexity in the total dendrites of vehicle or Acetate-treated cHet mice, at least 15 neurons from  $n = 3$  mice per group.
- H Sholl analysis of dendritic branching complexity in the basal and apical dendrites of vehicle or Acetate-treated cHet mice, at least 15 neurons from  $n = 3$  mice per group.

Data information: Data represent means  $\pm$  SEM. In (C, D), n.s. = nonsignificant, unpaired two-tailed  $t$ -test. In (F), \*\* $P < 0.01$  (apical), \*\* $P < 0.01$  (total; unpaired two-tailed  $t$ -test). In G, \* $P < 0.05$  (100  $\mu$ m), \* $P < 0.05$  (110  $\mu$ m); two-way ANOVA with Bonferroni *post hoc* test. In (H), \* $P < 0.05$  (80  $\mu$ m), \* $P < 0.05$  (90  $\mu$ m), \* $P < 0.05$  (100  $\mu$ m), \*\* $P < 0.01$  (110  $\mu$ m), \* $P < 0.05$  (120  $\mu$ m), \* $P < 0.05$  (130  $\mu$ m); two-way ANOVA with Bonferroni *post hoc* test).

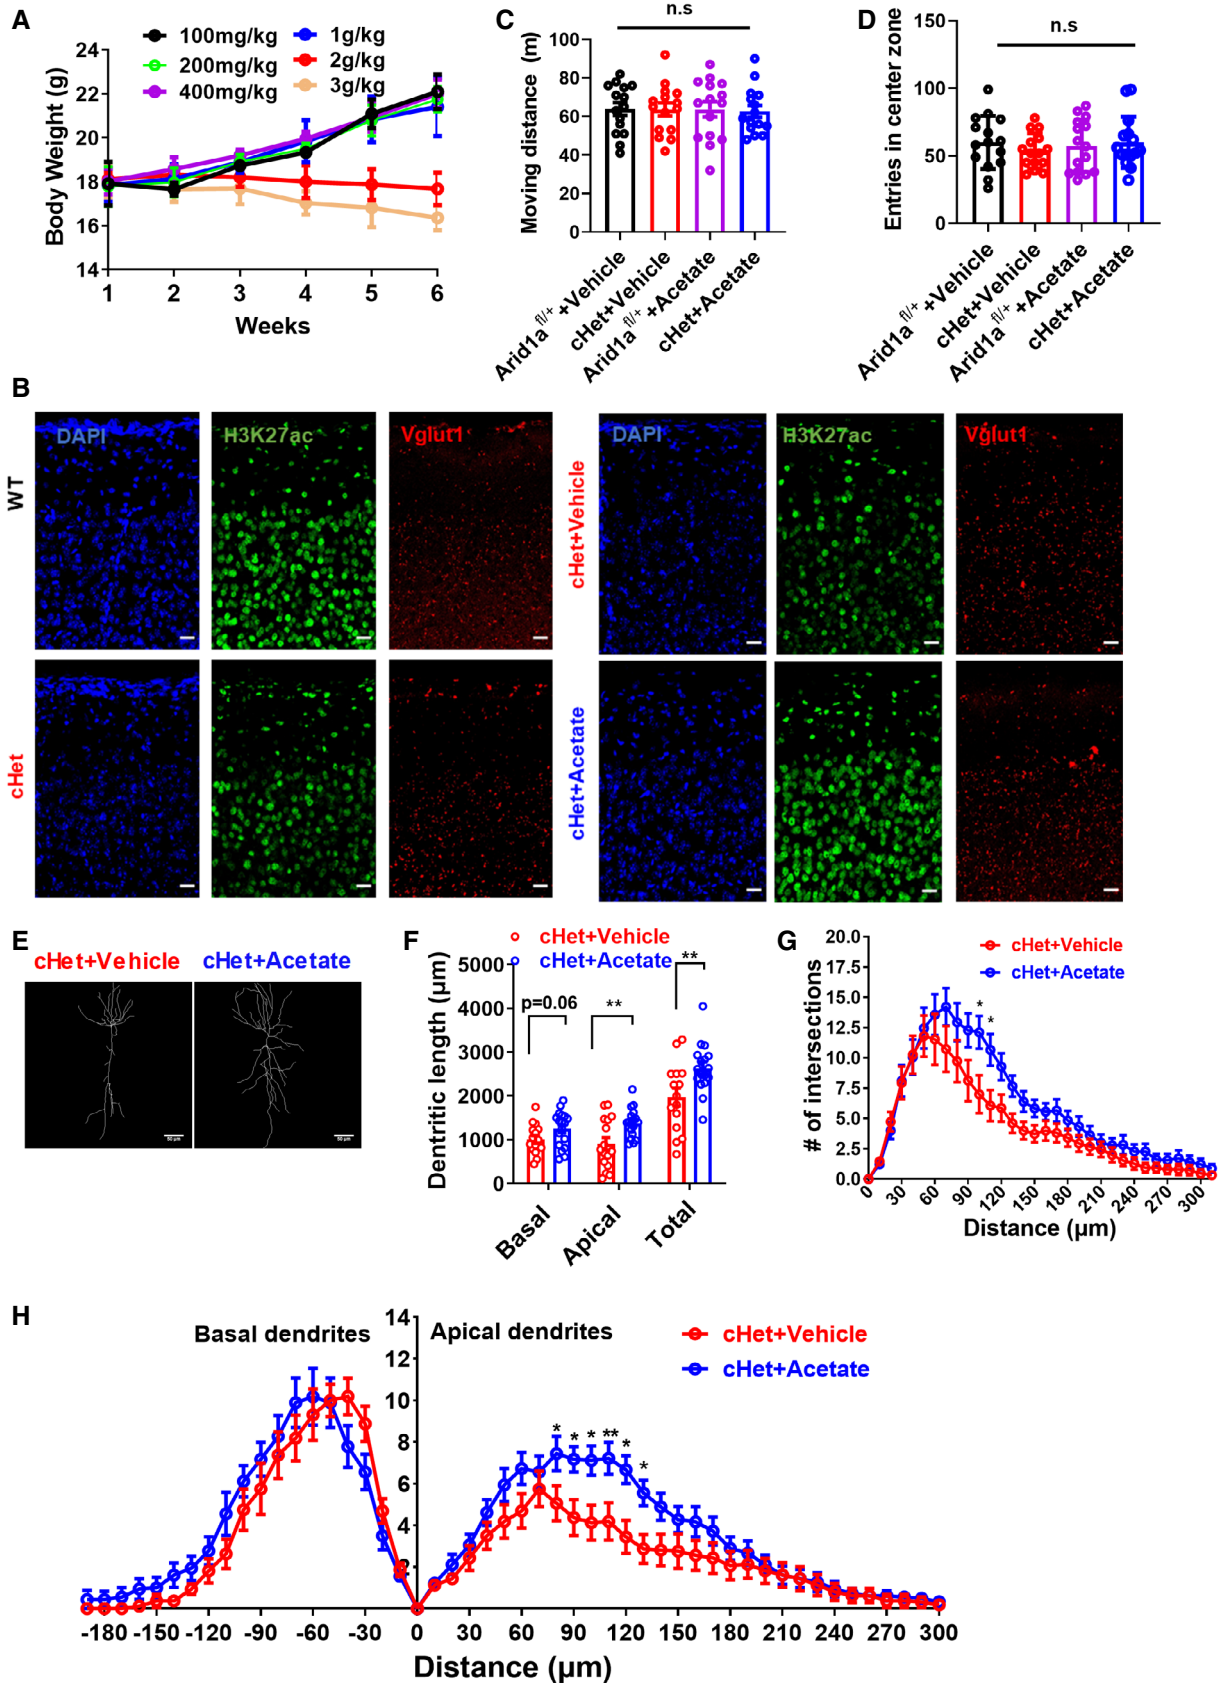

Figure EV2.

**Figure EV3. Altered gene expression profile caused by the haploinsufficiency of *Arid1a*.**

- A Schematic of RNA-seq experiment. Left, coronal section showing the distribution of excitatory neurons with red fluorescence of tdTomato.
- B The principal component analysis (PCA) of RNA-seq.
- C GO functional clustering of downregulated targets in *Arid1a*-haploinsufficiency transcriptome.
- D KEGG pathway analysis of upregulated targets in *Arid1a*-haploinsufficiency transcriptome.
- E Principal component analysis (PCA) results of H3K27ac ChIP-seq data based on enrichment signals at peak regions.
- F Left, heatmaps displaying enhanced (5061) and reduced (1899) H3K27ac peaks from ChIP-seq analysis in the *Arid1a*<sup>fl/+</sup> vs cHet mice. Right, Gene ontology (GO) functional clustering of genes that were upregulated and downregulated to identify biological processes regulated by H3K27ac ChIP-seq. The unit of the color key is normalized RPKM.
- G Effect of acetate on genome-wide occupancy of H3K27ac as determined by ChIP-seq. The unit of the color key is normalized RPKM.

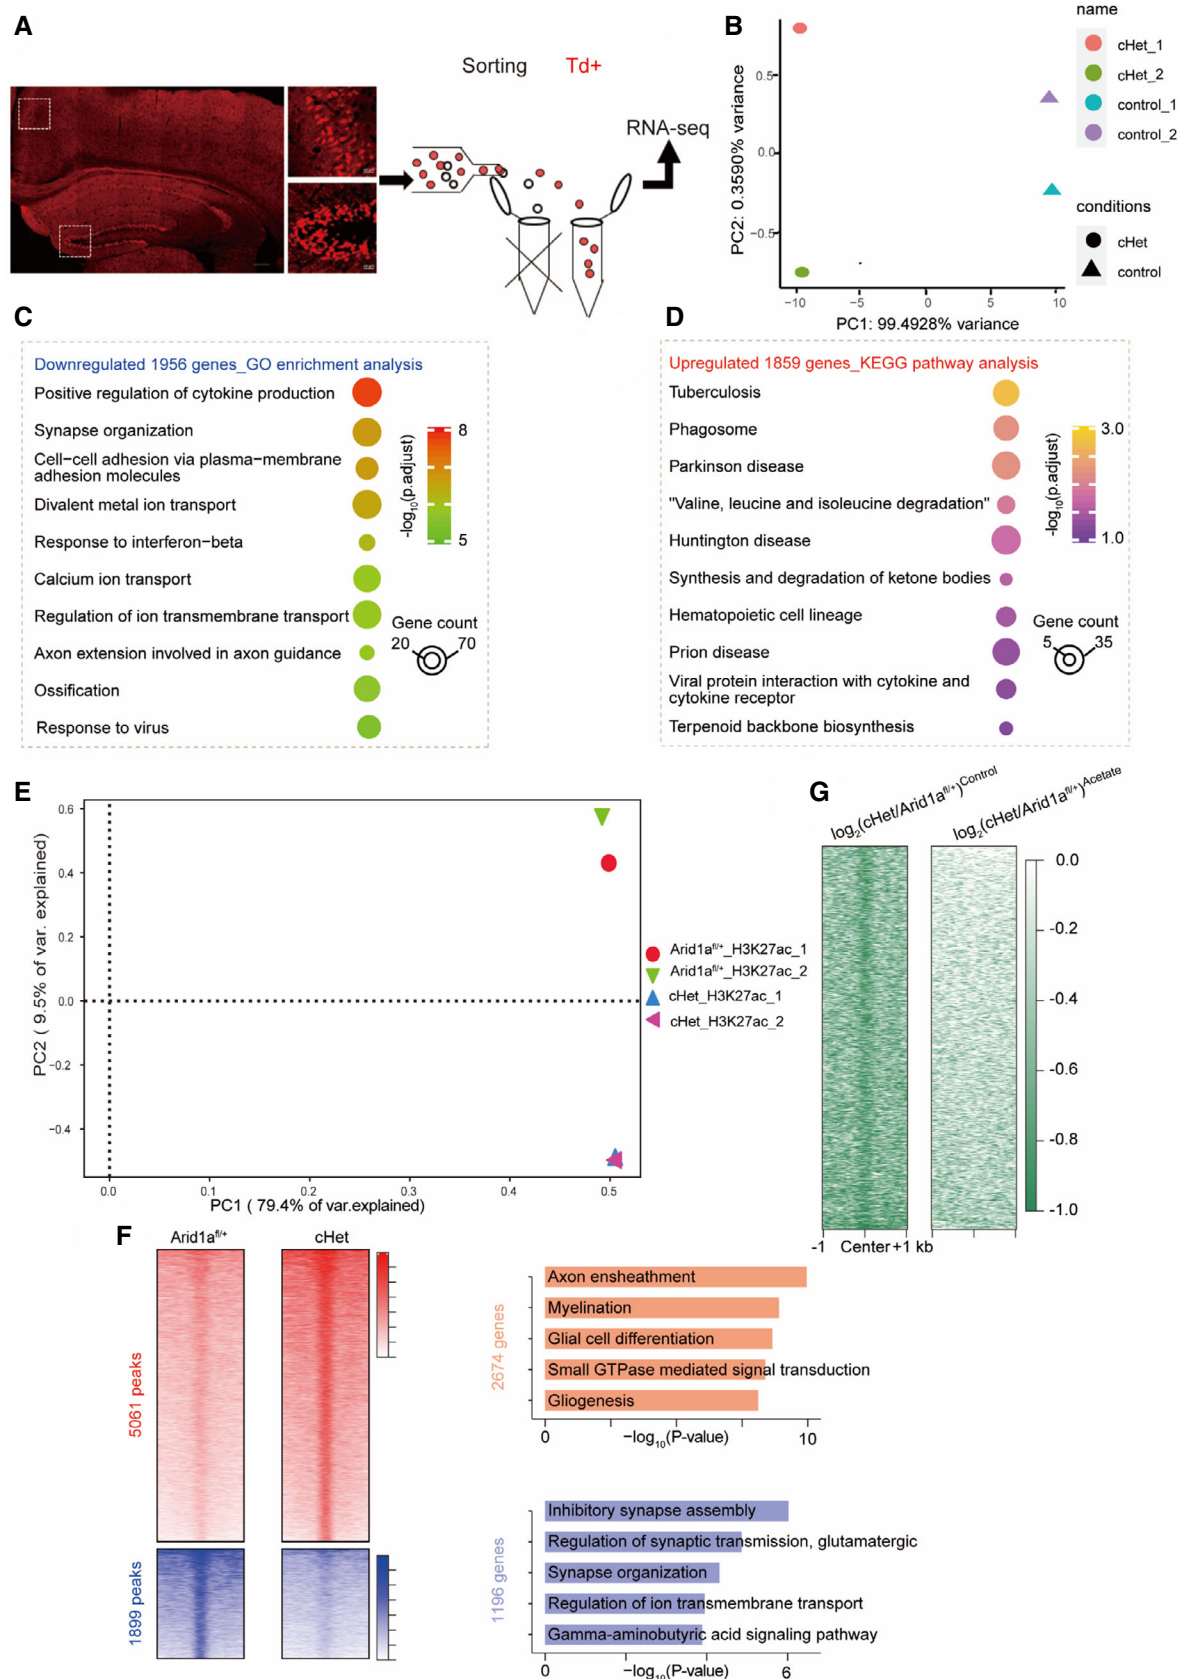

Figure EV3.

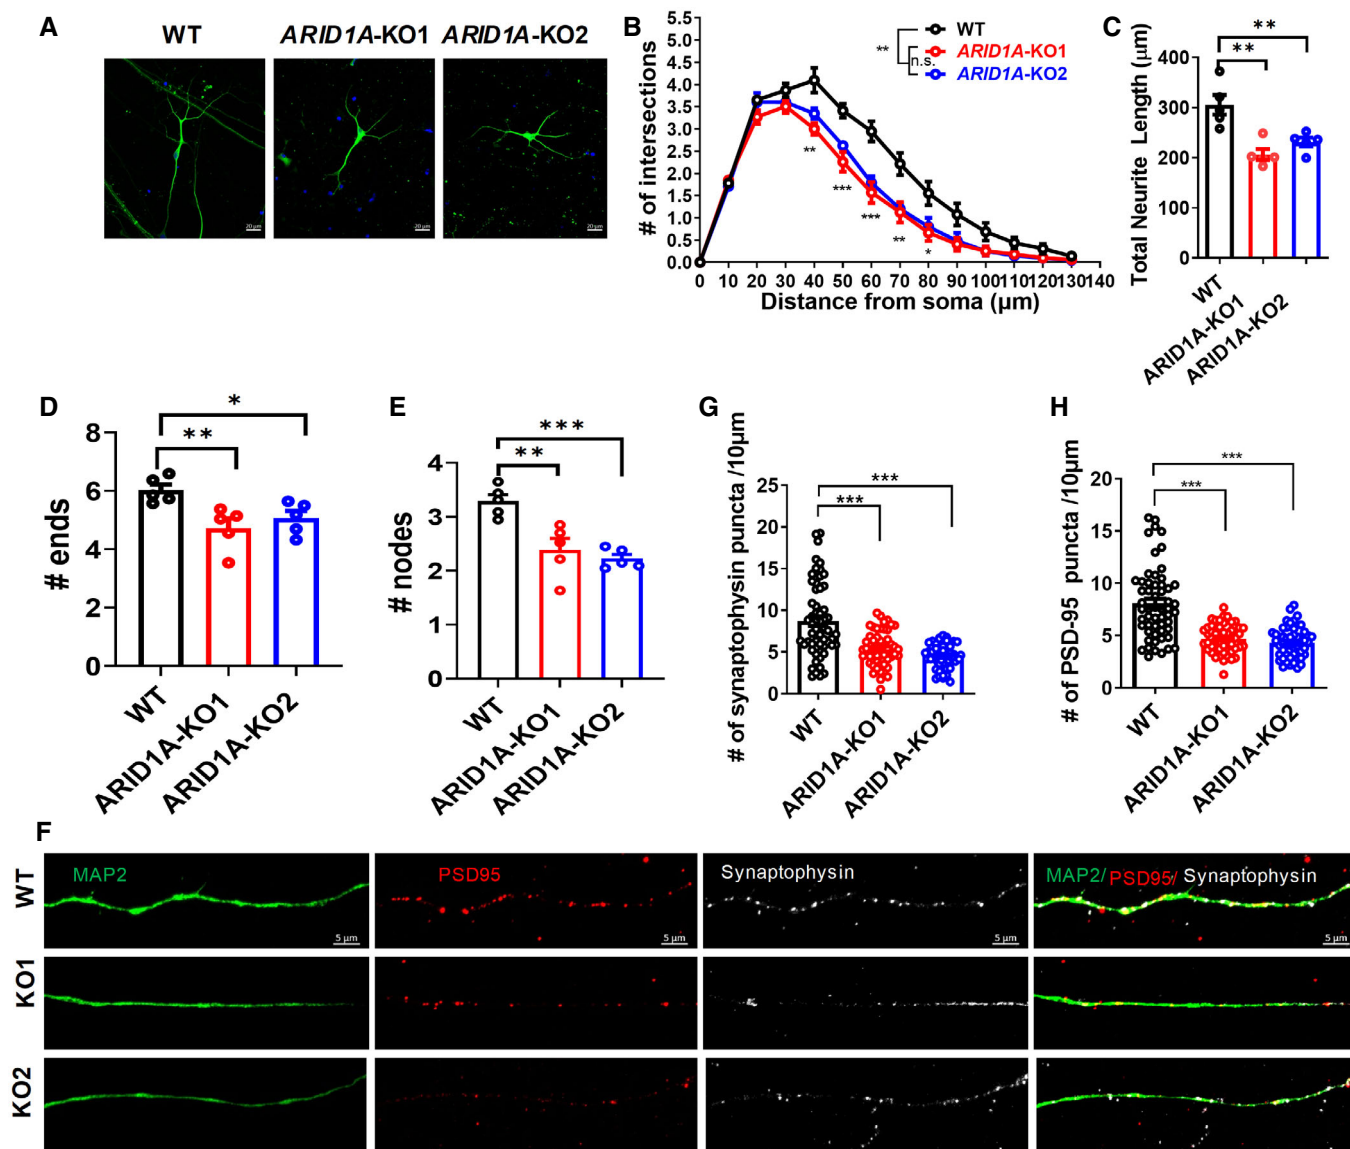

**Figure EV4. Loss of ARID1A decreased neurite complexity in hESCs-derived neurons.**

- A** Representative image of neurons derived from WT and *ARID1A* KO hESCs on day 40 of neural differentiation Scale Bar, 20  $\mu\text{m}$ .
- B** Sholl analysis shows that total neurite length decreased in *ARID1A* KO hESC-derived neurons on day 40 ( $n =$  at least 3 independent replicates).
- C–E** Compared with the WT group, *ARID1A* KO hESC-derived neurons exhibited decreased dendritic complexity, as shown by reduced length (C), ends (D), and nodes (E) ( $n =$  at least 3 independent replicates).
- F** Representative images of dendrites (MAP2, green) showing localization of foci of the pre- and postsynaptic protein complexes, synaptophysin, and PSD-95 proteins in WT and *ARID1A* KO hESC-derived neurons on day 55 Scale Bar, 5  $\mu\text{m}$ .
- G, H** Quantification of the spine density from synaptophysin (G) and PSD-95 protein (H) stained secondary dendrites of neurons on day 55 were significantly reduced in *ARID1A* KO hESC on day 55 of neural differentiation ( $n = 3$  independent replicates).

Data information: Data represent means  $\pm$  SEM. In (B),  $*P < 0.05$  (40  $\mu\text{m}$ ),  $***P < 0.01$  (50  $\mu\text{m}$ ),  $***P < 0.01$  (60  $\mu\text{m}$ ),  $**P < 0.01$  (70  $\mu\text{m}$ ),  $*P < 0.05$  (80  $\mu\text{m}$ ); ANOVA. In (C),  $**P < 0.01$  (KO1),  $**P < 0.01$  (KO2); unpaired two-tailed  $t$ -test. In (D),  $**P < 0.01$  (KO1),  $*P < 0.05$  (KO2); unpaired two-tailed  $t$ -test. In (E),  $**P < 0.01$  (KO1),  $***P < 0.001$  (KO2); unpaired two-tailed  $t$ -test. In (G),  $***P < 0.0001$  (KO1),  $***P < 0.0001$  (KO2); unpaired two-tailed  $t$ -test. In (H),  $***P < 0.0001$  (KO1),  $***P < 0.0001$  (KO2), unpaired two-tailed  $t$ -test.

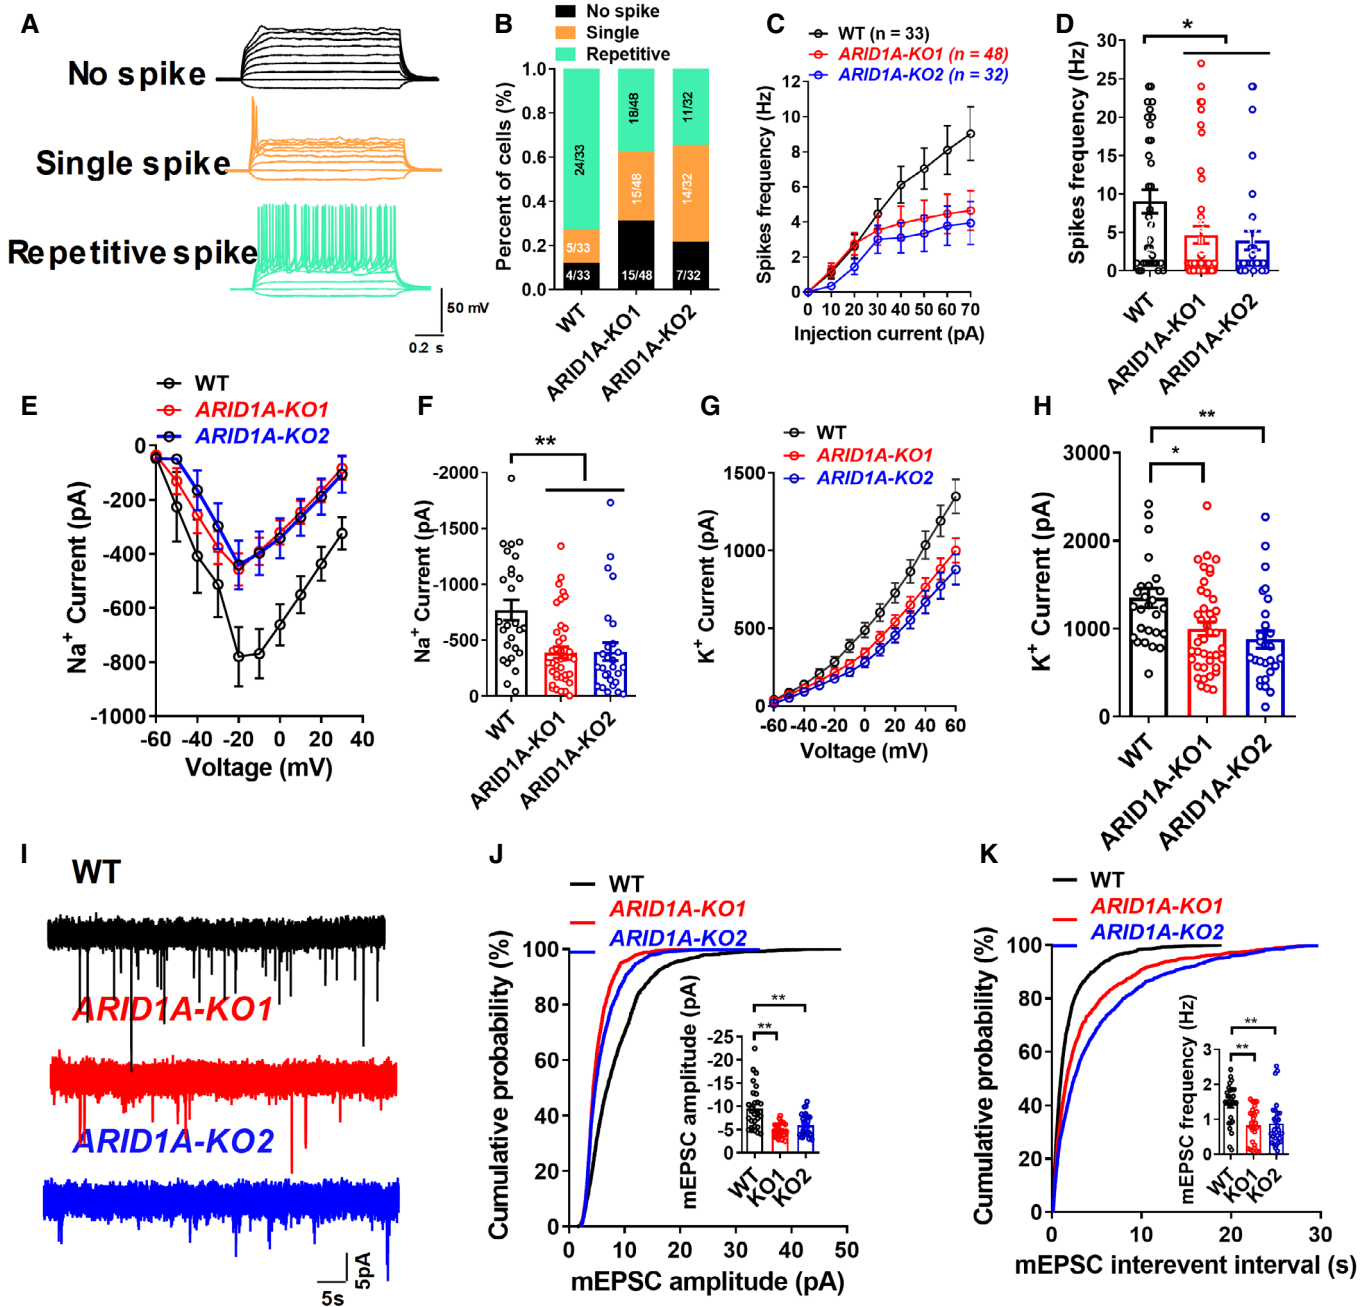

**Figure EV5. Loss of ARID1A results in electrophysiological defects and neuronal functions in hESCs-derived neurons.**

- A** Representative traces of membrane potential responding to step depolarization by current injection steps from  $-10$  pA to  $+60$  pA in  $10$  pA increments. Membrane potential was current-clamped at around  $-65$  mV. Representative traces were displayed by WT neurons.
- B** Quantification of the neuron maturity by recorded AP firing patterns on day 55 after differentiation ( $n \geq 30$  neurons in every group).
- C, D** Mean input/output relationship during WT and ARID1A hESC-derived neurons on day 55. ( $n \geq 30$  neurons in every group).
- E, F** Averaged current-voltage relationship (I-V curves) for Na<sup>+</sup> currents, recorded from hESC-derived neurons ( $n \geq 27$  neurons in every group).
- G, H** Averaged current-voltage relationship (I-V curves) for K<sup>+</sup> currents, recorded from hESC-derived neurons ( $n \geq 27$  neurons in every group).
- I** Detection of mEPSCs in whole-cell recordings of WT and ARID1A KO hESC-derived neurons on day 55.
- J** Amplitude of SC decreased significantly in ARID1A KO hESC-derived neurons ( $n \geq 25$  neurons in every group).
- K** Frequency of mEPSC decreased significantly in ARID1A KO hESC-derived neurons ( $n \geq 25$  neurons in every group).

Data information: Data represent means  $\pm$  SEM. In (D, F, H, J, K),  $*P < 0.05$ ,  $**P < 0.01$ , unpaired two-tailed t-test.
