# Supplementary material for: Acetate supplementation restores cognitive deficits caused by ARID1A haploinsufficiency in excitatory neurons
Source: PubMed Central journal article supplement (PMC9728054; doi:10.15252/emmm.202215795), 2022-11-17
Supplement: EMMM-14-e15795-s004.pdf [file EMMM-14-e15795-s004.pdf]

# **Appendix**

## **Table of contents**

Appendix Figure S1-S5

Appendix Table S1-S2

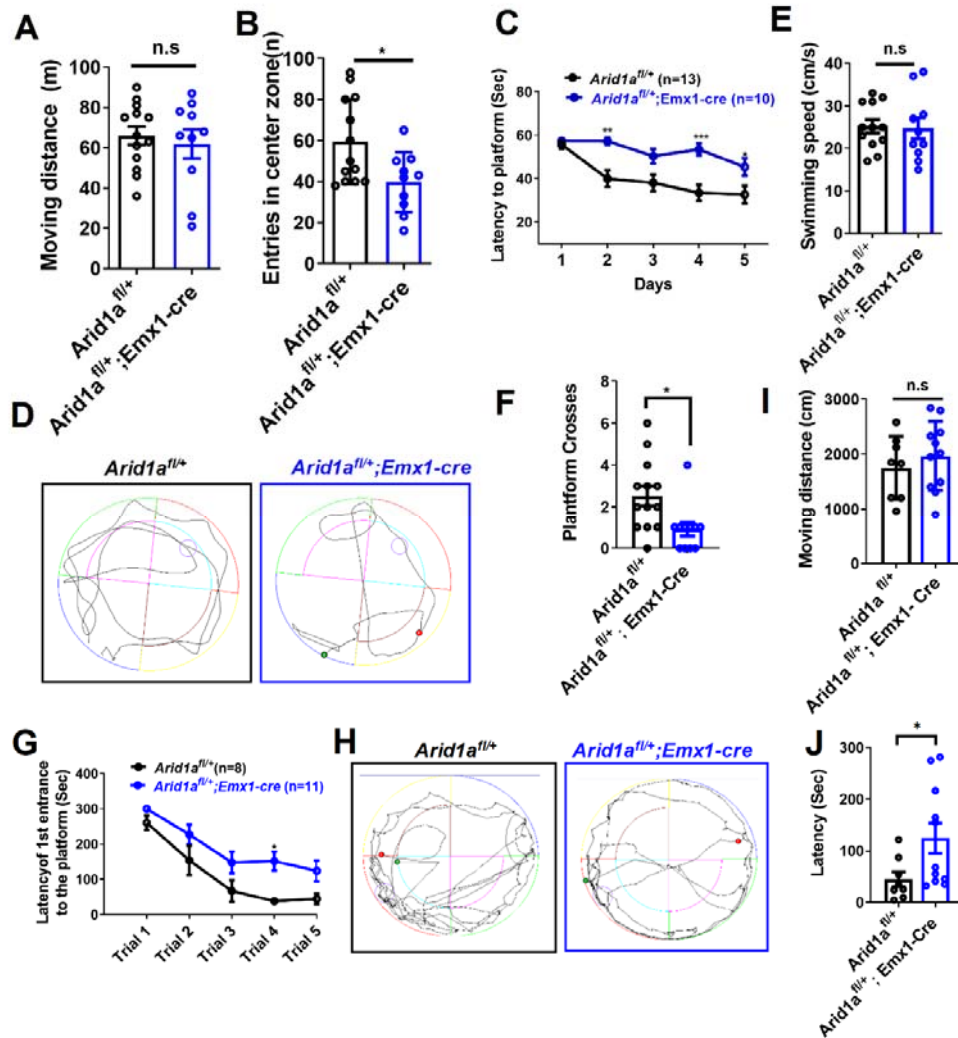

**Appendix Figure S1. Haploinsufficiency of *Arid1a* in forebrain leads to impaired learning and memory**

*Arid1a<sup>fl/+</sup>; Emx1-Cre* mice had similar locomotion compared to *Arid1a<sup>fl/+</sup>* littermate mice in an open field test over a 30-min period (*Arid1a<sup>fl/+</sup>*, n=13 mice; *Arid1a<sup>fl/+</sup>;Emx1-Cre*, n=10 mice).

*B* *Arid1a<sup>fl/+</sup>;Emx1-Cre* mice entered the center zone less frequently during the 30-min open field test compared to *Arid1a<sup>fl/+</sup>* littermate mice (*Arid1a<sup>fl/+</sup>*, n=13 mice; *Arid1a<sup>fl/+</sup>;Emx1-Cre*, n=10 mice).

C *Arid1a<sup>fl/+</sup>;Emx1-Cre* mice spent more time reaching the platform during the 5-day training in the Morris water maze test in the left (*Arid1a<sup>fl/+</sup>*, n=13 mice; *Arid1a<sup>fl/+</sup>;Emx1-Cre*, n=10 mice).

D Representative locomotive patterns of *Arid1a<sup>fl/+</sup>* and *Arid1a<sup>fl/+</sup>;Emx1-Cre* mice in the water maze test.

E *Arid1a<sup>fl/+</sup>;Emx1-Cre* mice showed similar swimming speed in Morris water maze test compared to *Arid1a<sup>fl/+</sup>* mice (*Arid1a<sup>fl/+</sup>*, n=13 mice; *Arid1a<sup>fl/+</sup>;Emx1-Cre*, n=10 mice; n.s=non-significant).

F *Arid1a<sup>fl/+</sup>;Emx1-Cre* mice showed less platform crossing in the Morris water maze test (*Arid1a<sup>fl/+</sup>*, n=13 mice; *Arid1a<sup>fl/+</sup>;Emx1-Cre*, n=10 mice; \* $P < 0.05$ , unpaired two-tailed *t*-test).

G *Arid1a<sup>fl/+</sup>;Emx1-Cre* mice spent more time finding the platform during the 5-day training in the Barnes maze test (*Arid1a<sup>fl/+</sup>*, n=8 mice; *Arid1a<sup>fl/+</sup>;Emx1-Cre*, n=11 mice).

H Representative tracing pathway of *Arid1a<sup>fl/+</sup>* and *Arid1a<sup>fl/+</sup>;Emx1-Cre* mice in the Barnes maze test.

I *Arid1a<sup>fl/+</sup>;Emx1-Cre* mice showed similar moving distance in Morris water maze test compared to GFP mice (*Arid1a<sup>fl/+</sup>*, n=8 mice; *Arid1a<sup>fl/+</sup>;Emx1-Cre*, n=11 mice; n.s=non-significant).

J *Arid1a<sup>fl/+</sup>;Emx1-Cre* mice showed longer latency finding the escape box in the Barnes maze test (*Arid1a<sup>fl/+</sup>*, n=8 mice; *Arid1a<sup>fl/+</sup>;Emx1-Cre*, n=11 mice; \*\* $P < 0.05$ , unpaired two-tailed *t*-test).

Data information: Data represent means  $\pm$  SEM. In (A, B, E, F, I, J) \* $P < 0.05$ , n.s=non-significant, unpaired two-tailed *t*-test. In C,  $P > 0.9999$  (day 1), \*\* $P < 0.01$ (day 2),

$P=0.0594$  (day 3),  $***P<0.001$ (day 4),  $*P<0.05$  (day 5), two-way ANOVA with Bonferroni post hoc test. In G,  $P>0.9999$  (Trial 1),  $P=0.2823$  (Trial 2),  $P=0.1829$  (Trial 3),  $*P<0.05$  (Trial 4),  $P=0.1982$  (Trial 5), two-way ANOVA with Bonferroni post hoc test.

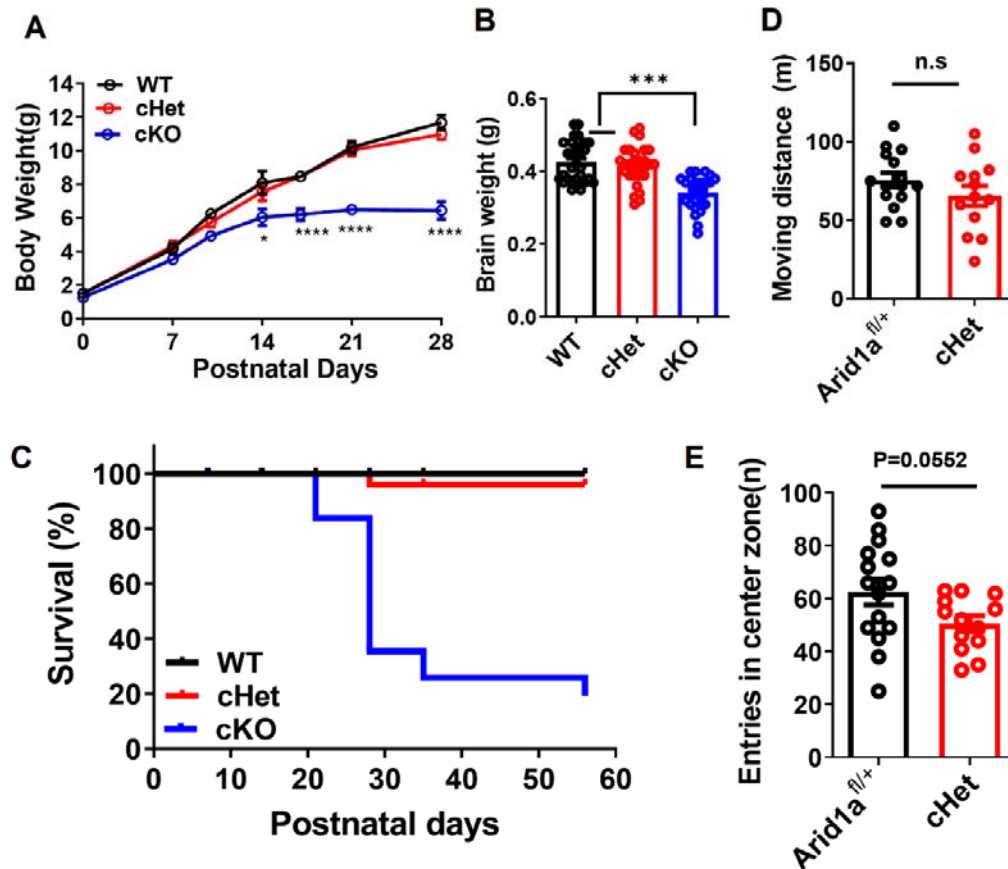

**Appendix Figure S2. Loss of *Arid1a* in excitatory neurons leads to high postnatal lethality**

A Quantitative comparison of body weight in P0-P28 from WT, cHet and cKO mice. n=4-14.

B Brain weight of the indicated genotypes at P17.

C Kaplan-Meier graph shows survival curves of the WT, cHet and cKO mice groups. Mice in the homozygous (cKO) group exhibited significantly decreased survival (blue) relative to the

other groups. A majority of *Arid1a<sup>fl/fl</sup>;Nex-Cre* mice died by P28.

D cHet mice had similar locomotion compared to *Arid1a<sup>fl/+</sup>* littermate mice in open field test over a 30-min period (*Arid1a<sup>fl/+</sup>*, n=15 mice; cHet, n=13 mice).

E cHet mice had less entry into the center zone during the 30-min open field test compared to *Arid1a<sup>fl/+</sup>* littermate mice (*Arid1a<sup>fl/+</sup>*, n=15 mice; cHet, n=13 mice).

Data information: Data represent means  $\pm$  SEM. In A, \* $P < 0.05$  (day 14), \*\*\* $P < 0.001$  (day 17), \*\*\* $P < 0.001$  (day 21), \*\*\* $P < 0.001$  (day 28) versus the other groups, unpaired Student's  $t$ -test. \*\*\* $P < 0.001$ . In C, \*\*\* $P < 0.001$ , two-tailed log-rank tests. In (B, D, E), \*\*\* $P < 0.001$ , n.s=non-significant, unpaired two-tailed  $t$ -test.

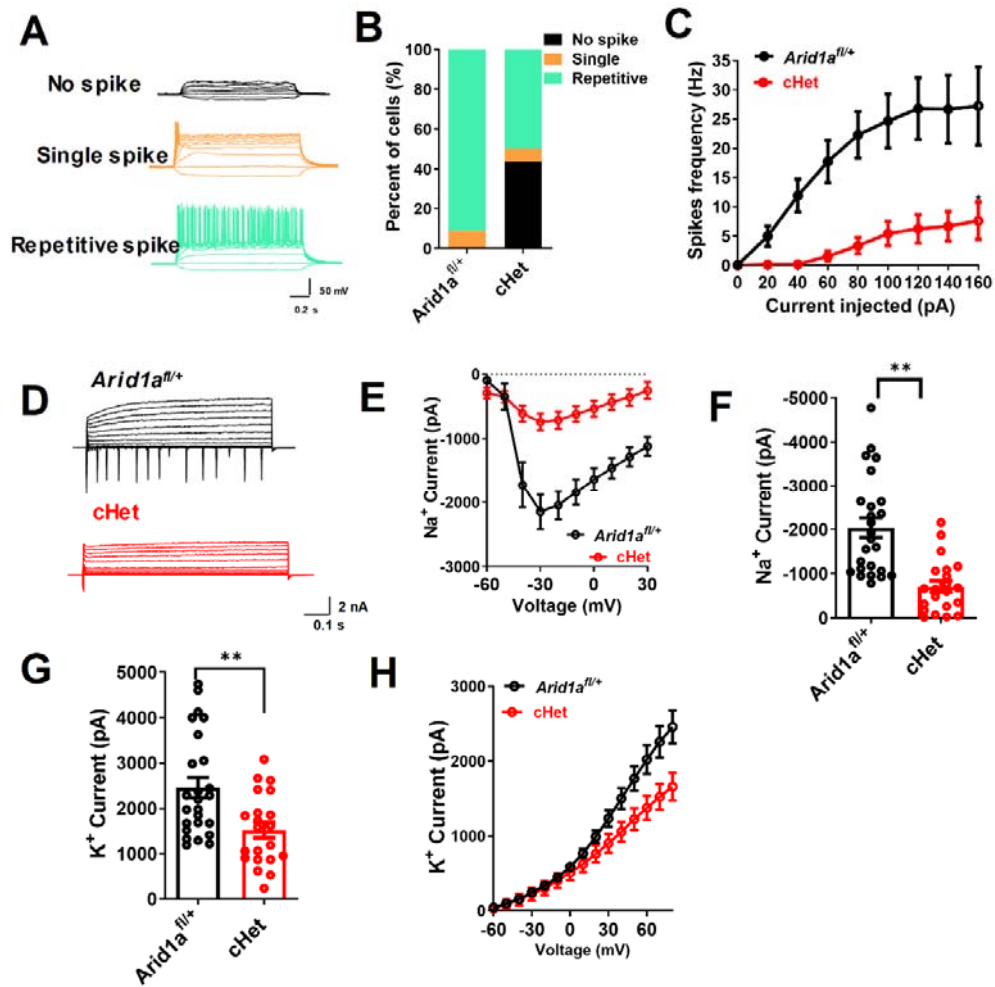

### Appendix Figure S3. Electrophysiological defects in hippocampal neurons with *Arid1a* haploinsufficiency

A Representative traces of membrane potential responding to step depolarization by current injection steps from -10 pA to +60 pA in 10pA increments. Membrane potential was current-clamped at around -65 mV. Representative traces were displayed by *Arid1a*<sup>fl/+</sup> neurons.

B Quantification of the neuron maturity by recorded AP firing patterns in *Arid1a*<sup>fl/+</sup> and cHet hippocampal CA1 neurons.

C Mean input/output relationship in WT and cHet hippocampal CA1 neurons.

D Representative hyperpolarizing inward current density traces of total current in *Arid1a<sup>fl/+</sup>* and cHet hippocampal CA1 neurons.

E, F Averaged current-voltage relationship (I-V curves) for Na<sup>+</sup> currents, recorded from *Arid1a<sup>fl/+</sup>* and cHet hippocampal CA1 neurons.

G, H Average current-voltage relationship (I-V curves) for K<sup>+</sup> currents, recorded from *Arid1a<sup>fl/+</sup>* and cHet hippocampal CA1 neurons.

Data information: Data represent means  $\pm$  SEM. In (C, F, G), \* $P < 0.05$ , \*\* $P < 0.01$  (unpaired two-tailed  $t$ -test).

)

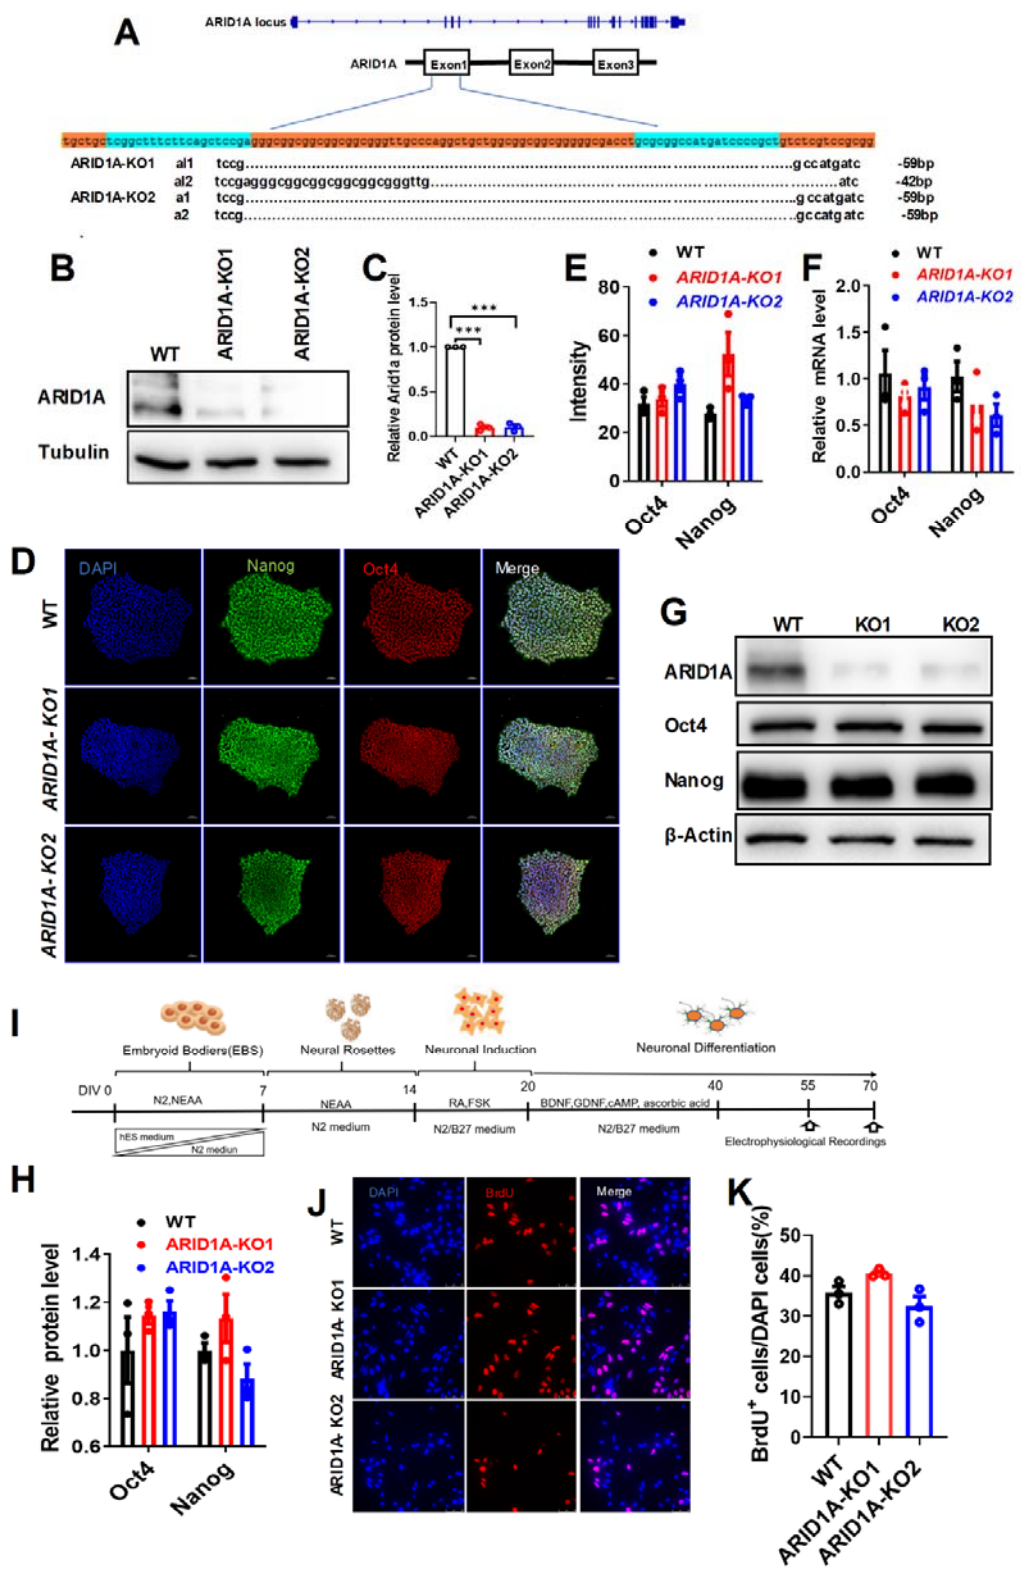



**Appendix Figure S4. The deletion of *ARID1A* has no effect on the pluripotency of hESCs**

A Strategy for using CRISPR/Cas9 to complete knock out human *ARID1A* in H9 hESCs. The sgRNA sequences are labeled in blue and PAM recognition sequences are highlighted in red.

Dotted line indicates the deletion of allele 1 (a1) and allele 2 (a2).

B Western blot analysis of *ARID1A* protein expression levels.  $\beta$ -Tubulin was used as a loading control.

C Quantification of the density of the *ARID1A* protein bands by normalization to the intensity of  $\beta$ -Tubulin bands.  $n=3$ .

D Representative images of immunostaining expression of OCT4 (green) and Nanog(red) in WT and *ARID1A* KO clone. Scale bar, 50  $\mu$ m.

E Relative fluorescence intensities of OCT4 and Nanog were elevated upon the loss of *ARID1A* in the hESC clones.  $n = 3$ .

F Real-time PCR analysis of OCT4 and Nanog mRNA levels in WT and *ARID1A* KO clones. The amount of mRNA was normalized to GAPDH levels.  $n =$  three experimental replicates.

G Western blot analysis of OCT4 and Nanog protein expression in WT and *ARID1A* KO clones. Tubulin was used as a loading control.

H Quantification of the density of the OCT4 and Nanog protein bands by normalization to the intensity of  $\beta$ -Actin bands.

I Schematic protocol of neural differentiation of hESCs. RA, retinoic acid. BDNF, brain-derived neurotrophic factor. GDNF, glial cell line-derived neurotrophic factor.

J WT and *ARID1A* KO hESCs immunostained positive for BrdU.

K Bar chart displayed percentage of the BrdU-positive cells.  $n = 3$  biological replicates. Scale

bar, 50  $\mu$ m.

Data information: Data represent means  $\pm$  SEM. In C, \*\*\* $P < 0.001$  (unpaired two-tailed  $t$ -test).

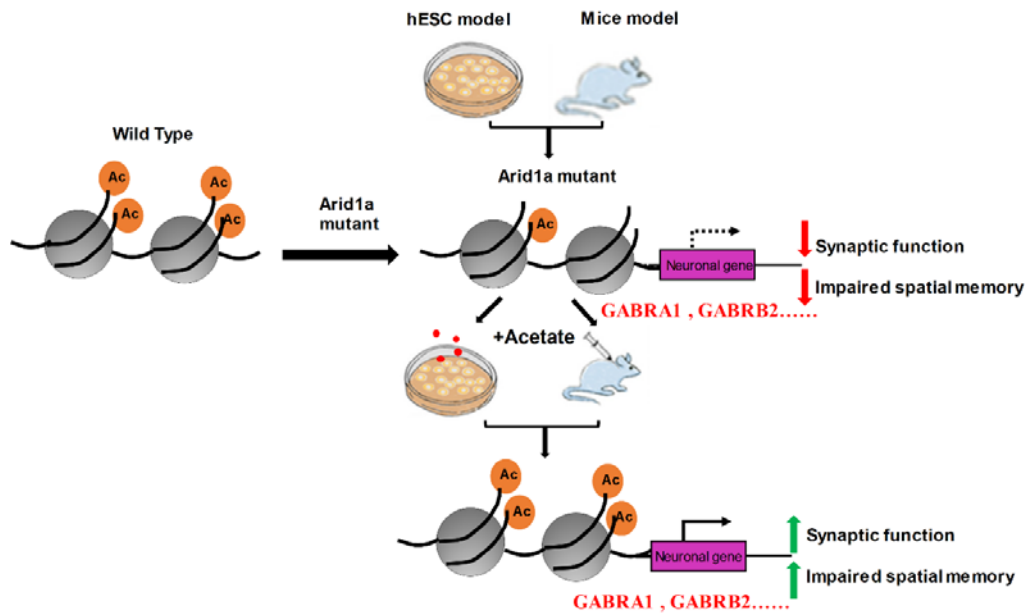

### Appendix Figure S5. The working model of ARID1A in excitatory neurons

ARID1A haploinsufficiency in excitatory neurons disrupts histone modifications in genes essential for the functions of excitatory neurons and cognition in mice. After acetate supplementation can restore the expression of key neuronal genes, including GABRA1, GABRB2, the deficits of cognition and neuronal morphology are rescued in both murine and human neurons.

**Appendix TableS1. Primers for Genotyping**

| Genotyping         | Sequence                   |
|--------------------|----------------------------|
| <i>ARID1A</i> -F:  | TGG GCA GGA AAG AGT AAT GG |
| <i>ARID1A</i> -R:  | AAC ACC ACT TTC CCA TAG GC |
| <i>Nex-Cre</i> P1  | GAGTCCTGGAATCAGTCTTTTTC    |
| <i>Nex-Cre</i> P2  | AGAATGTGGAGTAGGGTGAC       |
| <i>Nex-Cre</i> P3  | CCGCATAACCAGTGAAACAG       |
| <i>Emx1-Cre</i> P1 | GCGGTCTGGCAGTAAAACTATC     |
| <i>Emx1-Cre</i> P2 | GTGAAACAGCATTGCTGTCACTT    |
| <i>Emx1-Cre</i> P3 | AAGGTGTGGTCCAGAATCG        |
| <i>Emx1-Cre</i> P4 | CTCTCCACCAGA AGGCTGAG      |

**Appendix Table S2. Real-Time PCR primers**

| RT-PCR          | Forward sequence (5'-3') | Reverse sequence (5'-3') |
|-----------------|--------------------------|--------------------------|
| <i>Gabrb2</i>   | ATGTCGCTGGTTAAAGAGACG    | CTGCCACTCGGTTGTCCAAA     |
| <i>Gabra1</i>   | AAAAGTCGGGGTCTCTCTGAC    | CAGTCGGTCCAAAATTCTTGTGA  |
| <i>Slitrk1</i>  | GAAGGGGACTTACACGTAGACT   | AGTGAGGGAATTGCCATGCAG    |
| <i>Cacna2d1</i> | CTGCTGGCCTTGACTCTGAC     | CACTCCACTTGCTGTTTTTGC    |
| <i>Fzd6</i>     | ATGGAAAGGTCCCCGTTTCTG    | GGGAAGAACGTCATGTTGTAAGT  |
| <i>Rp1</i>      | CCTGTAGTGGCTAAACGCATC    | CAGCAGAGCGTCAAAAGTCTTA   |
| <i>Tnf</i>      | GGTGCCTATGTCTCAGCCTCTT   | GCCATAGAACTGATGAGAGGGAG  |
| <i>Vgf</i>      | CTTTGACACCCTTATCCAAGGCG  | GCTAATCCTTGCTGAAGCAGGC   |
| <i>Lrfn1</i>    | GGCATCCGTATGTACCAAGTGC   | GCCAGGTCATTCACTAGGAAGG   |
| <i>Clql1</i>    | AGTATGTGGGCAGACCTCTGCA   | TCCAGATGCAGGATCACGCTGT   |
| <i>Lrrtm4</i>   | TTCCTCGTCTCTTCAACCTGCG   | CAGGCTCGATTGCTTGGATGTC   |
| <i>App</i>      | TCCGTGTGATCTACGAGCGCAT   | GCCAAGACATCGTCGGAGTAGT   |

|              |                         |                          |
|--------------|-------------------------|--------------------------|
| <i>Cntn2</i> | CTCCAGCAGAATCCGCACTAAG  | CTCCATTCTGGTACTCTCGTGAC  |
| <i>Tac1</i>  | TAATGGGCAAGCGGGATGCTGA  | CCATTAGTCCAACAAAGGAATCTG |
| <i>Faim2</i> | GCAACTTACCTGACTCTGGCTTG | TGGACAGCATCCCAGTGAGGTA   |
| <i>Mapk8</i> | CGCCTTATGTGGTGACTCGCTA  | TCCTGGAAAGAGGATTTTGTGGC  |
| <i>Bok</i>   | TTCATGCCCTGGTTGACTGCCT  | AAGCCAGGATCTGTGCTGACCA   |
| <i>Agap2</i> | CGCAACCTATGGGCTCAATGTG  | GCTACAGGAGTAGATGCAGCTG   |
| <i>Epha7</i> | GATGTTGCCACACTTGAGGAAGC | ATGATGGTCCCTGCTACAGCCA   |
| <i>Ripk1</i> | GACTGTGTACCCTTACCTCCGA  | CACTGCGATCATTCTCGTCCTG   |
| <i>Bbc3</i>  | ACCGCTCCACCTGCCGTCAC    | ACGGGCGACTCTAAGTGCTGC    |
| <i>Dapk3</i> | AAGCAGGAGACGCTGACGAACA  | AATGCTCCAGGCTCTGTGCGAT   |
| <i>Bax</i>   | AGGATGCGTCCACCAAGAAGCT  | TCCGTGTCCACGTCAGCAATCA   |
