# Supplementary material for: Acetate supplementation restores cognitive deficits caused by ARID1A haploinsufficiency in excitatory neurons
Source: PubMed Central journal article supplement (PMC9728054; doi:10.15252/emmm.202215795), 2022-11-17

**Figure 4**

**A**

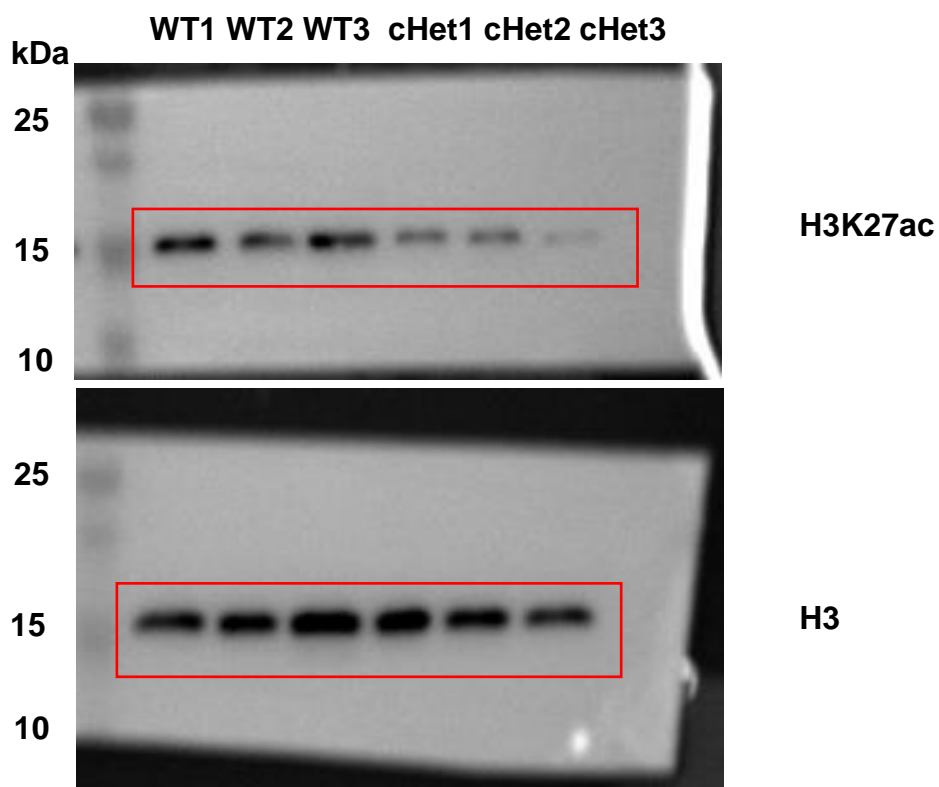

**B**

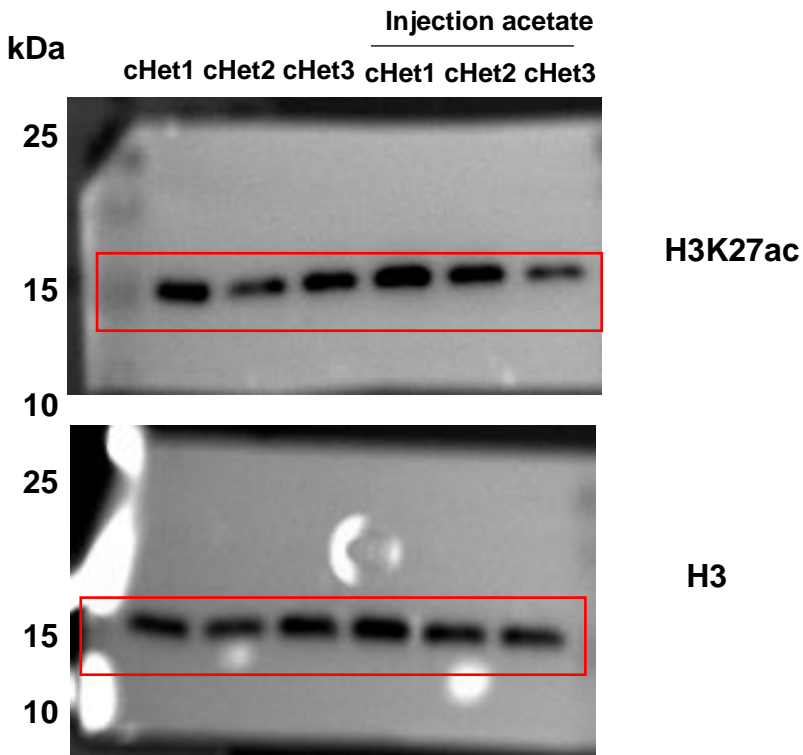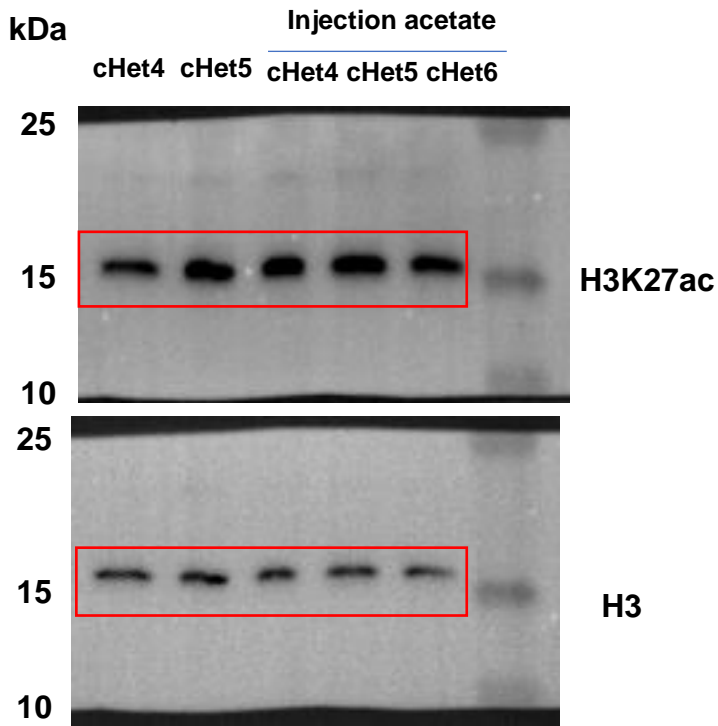

Supplement: EMMM-14-e15795-s005.pdf [file EMMM-14-e15795-s005.pdf]
